# Supplementary material for: Anti-tumor activity of the beta-adrenergic receptor antagonist propranolol in neuroblastoma
Source: PubMed Central journal article supplement (PMC3960198; doi:10.18632/oncotarget.1083), 2013-11-04
Supplement: oncotarget-05-0161-s001.pdf [file oncotarget-05-0161-s001.pdf]

## Anti-tumor activity of the beta-adrenergic receptor antagonist propranolol in neuroblastoma - Wolter et al

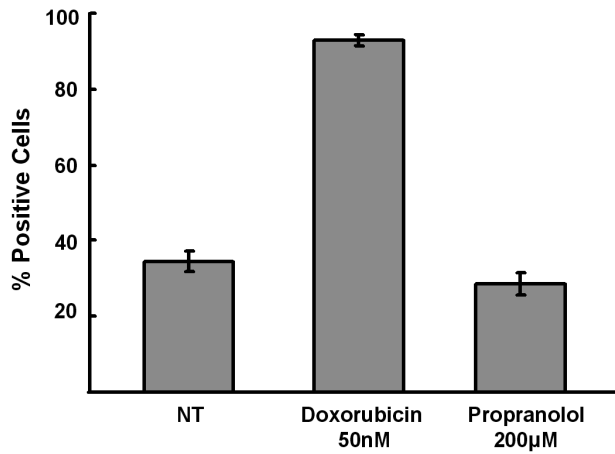

**Supplemental Figure 1: Immunostaining of  $\gamma$ H2AX positive cells following treatment with 24h 50nM doxorubicin or 200µM propranolol.** Quantification of  $\gamma$ H2AX-phosphorylated positive cells pooled from 50 randomly selected fields-of-views (FOV) from are shown.
